# Supplementary material for: Experience of Pharmacists with Anti-Cancer Medicine Shortages in Pakistan: Results of a Qualitative Study
Source: MDPI journal article supplement (doi:10.3390/ijerph192316373), 2022-12-06
Supplement: s1 [file s1]

# **Supplementary Materials File S1: Questionnaire for “Experience of pharmacists with anti-cancer medicine shortages in Pakistan: results of a qualitative study”**

Supplementary file

## **INTERVIEW GUIDE FOR ONCOLOGY PHARMACIST**

| Discussion Topics                                                                                 | Details                                                                                                                                                                                                                                                                                                                                                                                                                                                                                                                                                                                                                                                                                                                                                                                                                                                                       |         |          |         |          |        |   |  |  |  |  |   |  |  |  |  |   |  |  |  |  |   |  |  |  |  |   |  |  |  |  |
|---------------------------------------------------------------------------------------------------|-------------------------------------------------------------------------------------------------------------------------------------------------------------------------------------------------------------------------------------------------------------------------------------------------------------------------------------------------------------------------------------------------------------------------------------------------------------------------------------------------------------------------------------------------------------------------------------------------------------------------------------------------------------------------------------------------------------------------------------------------------------------------------------------------------------------------------------------------------------------------------|---------|----------|---------|----------|--------|---|--|--|--|--|---|--|--|--|--|---|--|--|--|--|---|--|--|--|--|---|--|--|--|--|
| 1. General information                                                                            | a. Gender: _____<br>b. Age: _____<br>c. Years of anticancer medicine related experience: _____<br>d. Type of hospital: _____<br>e. Designation: _____<br>f. Email ID: _____                                                                                                                                                                                                                                                                                                                                                                                                                                                                                                                                                                                                                                                                                                   |         |          |         |          |        |   |  |  |  |  |   |  |  |  |  |   |  |  |  |  |   |  |  |  |  |   |  |  |  |  |
| 2. What are your general thoughts about anticancer medicines shortages?                           | a. Do you experience anticancer medicine shortages in your practice?<br>b. How often do anticancer medicines shortages occur in your practice?<br>c. What ethical dilemma you have to face while dealing with chemotherapy shortages?<br>d. List specific names of anticancer medicines in shortage (generic name, brand name, strength, and dosage form) during the last six months in your hospital. <table border="1" style="margin-top: 10px;"> <thead> <tr> <th>SR.NO</th><th>BRAND</th><th>GENERIC</th><th>STRENGTH</th><th>DOSAGE</th></tr> </thead> <tbody> <tr><td>1</td><td></td><td></td><td></td><td></td></tr> <tr><td>2</td><td></td><td></td><td></td><td></td></tr> <tr><td>3</td><td></td><td></td><td></td><td></td></tr> <tr><td>4</td><td></td><td></td><td></td><td></td></tr> <tr><td>5</td><td></td><td></td><td></td><td></td></tr> </tbody> </table> | SR.NO   | BRAND    | GENERIC | STRENGTH | DOSAGE | 1 |  |  |  |  | 2 |  |  |  |  | 3 |  |  |  |  | 4 |  |  |  |  | 5 |  |  |  |  |
| SR.NO                                                                                             | BRAND                                                                                                                                                                                                                                                                                                                                                                                                                                                                                                                                                                                                                                                                                                                                                                                                                                                                         | GENERIC | STRENGTH | DOSAGE  |          |        |   |  |  |  |  |   |  |  |  |  |   |  |  |  |  |   |  |  |  |  |   |  |  |  |  |
| 1                                                                                                 |                                                                                                                                                                                                                                                                                                                                                                                                                                                                                                                                                                                                                                                                                                                                                                                                                                                                               |         |          |         |          |        |   |  |  |  |  |   |  |  |  |  |   |  |  |  |  |   |  |  |  |  |   |  |  |  |  |
| 2                                                                                                 |                                                                                                                                                                                                                                                                                                                                                                                                                                                                                                                                                                                                                                                                                                                                                                                                                                                                               |         |          |         |          |        |   |  |  |  |  |   |  |  |  |  |   |  |  |  |  |   |  |  |  |  |   |  |  |  |  |
| 3                                                                                                 |                                                                                                                                                                                                                                                                                                                                                                                                                                                                                                                                                                                                                                                                                                                                                                                                                                                                               |         |          |         |          |        |   |  |  |  |  |   |  |  |  |  |   |  |  |  |  |   |  |  |  |  |   |  |  |  |  |
| 4                                                                                                 |                                                                                                                                                                                                                                                                                                                                                                                                                                                                                                                                                                                                                                                                                                                                                                                                                                                                               |         |          |         |          |        |   |  |  |  |  |   |  |  |  |  |   |  |  |  |  |   |  |  |  |  |   |  |  |  |  |
| 5                                                                                                 |                                                                                                                                                                                                                                                                                                                                                                                                                                                                                                                                                                                                                                                                                                                                                                                                                                                                               |         |          |         |          |        |   |  |  |  |  |   |  |  |  |  |   |  |  |  |  |   |  |  |  |  |   |  |  |  |  |
| 3. What are the reasons for cancer medicines shortages?                                           | a. What are the reasons for cancer medicines shortages from the perspectives of medicine manufacturers?<br>b. What are the reasons for cancer medicines shortages from the perspectives of pharmaceutical distributors or wholesalers?<br>c. What are the reasons for cancer medicines shortages from the perspectives of healthcare institutes?<br>d. Are there any other reasons causing cancer medicines shortages?<br>e. Among those causes mentioned above, what are the three most important reasons in your opinion?                                                                                                                                                                                                                                                                                                                                                   |         |          |         |          |        |   |  |  |  |  |   |  |  |  |  |   |  |  |  |  |   |  |  |  |  |   |  |  |  |  |
| 4. What are the effects of cancer medicines shortages on patients (care outcome) and pharmacists? | Patients:<br>1) Financial consequences<br>2) Clinical consequences<br>Pharmacists:                                                                                                                                                                                                                                                                                                                                                                                                                                                                                                                                                                                                                                                                                                                                                                                            |         |          |         |          |        |   |  |  |  |  |   |  |  |  |  |   |  |  |  |  |   |  |  |  |  |   |  |  |  |  |
| 5. What action(s) did you take to manage chemotherapy shortages?                                  |                                                                                                                                                                                                                                                                                                                                                                                                                                                                                                                                                                                                                                                                                                                                                                                                                                                                               |         |          |         |          |        |   |  |  |  |  |   |  |  |  |  |   |  |  |  |  |   |  |  |  |  |   |  |  |  |  |

|                                                                                      |                                                                                                                                                                                                                                                                                                                                                                                                                                                                                                                                               |
|--------------------------------------------------------------------------------------|-----------------------------------------------------------------------------------------------------------------------------------------------------------------------------------------------------------------------------------------------------------------------------------------------------------------------------------------------------------------------------------------------------------------------------------------------------------------------------------------------------------------------------------------------|
| <p>6. How can we manage or solve the medicines shortage problem in your opinion?</p> | <p>a. What could the governmental authorities do to manage cancer medicines shortages?</p> <p>b. What could the drug manufacturers do to deal with cancer medicine shortages?</p> <p>c. What could the distributors or wholesalers do to deal with cancer medicines shortages?</p> <p>d. What could the healthcare institutions do to deal with cancer medicines shortages?</p> <p>e. Are there any other solutions to manage this problem?</p> <p>f. Among those solutions, what are the three most important solutions in your opinion?</p> |
|--------------------------------------------------------------------------------------|-----------------------------------------------------------------------------------------------------------------------------------------------------------------------------------------------------------------------------------------------------------------------------------------------------------------------------------------------------------------------------------------------------------------------------------------------------------------------------------------------------------------------------------------------|
